# Supplementary material for: Making the move towards modernized greener separations: introduction of the analytical method greenness score (AMGS) calculator
Source: Royal Society of Chemistry journal article supplement (doi:10.1039/c8gc03875a), 2019-01-01
Supplement: c8gc03875a1.pdf [file c8gc03875a1.pdf]

|         | Greenness Score | % of greenness score    |                      |                   |
|---------|-----------------|-------------------------|----------------------|-------------------|
|         |                 | Instrument Energy Score | Solvent Energy Score | Solvent EHS Score |
| A       | 2602            | 34.7%                   | 35.4%                | 29.9%             |
|         | 4520            | 10.3%                   | 62.1%                | 27.6%             |
|         | 3314            | 10.4%                   | 56.5%                | 33.2%             |
|         | 4104            | 13.1%                   | 57.4%                | 29.6%             |
|         | 6208            | 18.3%                   | 48.0%                | 33.7%             |
|         | 1053            | 21.3%                   | 68.6%                | 10.1%             |
| B       | 3207            | 16.7%                   | 56.4%                | 26.9%             |
|         | 3617            | 32.1%                   | 41.9%                | 26.1%             |
|         | 881             | 33.9%                   | 57.6%                | 8.5%              |
| C       | 3213            | 14.7%                   | 59.3%                | 26.0%             |
|         | 2860            | 7.5%                    | 63.7%                | 28.8%             |
| D       | 646             | 20.8%                   | 69.0%                | 10.2%             |
|         | 306             | 63.7%                   | 31.7%                | 4.7%              |
|         | 863             | 31.8%                   | 46.3%                | 21.9%             |
| E       | 2347            | 31.8%                   | 32.5%                | 35.7%             |
|         | 1496            | 25.8%                   | 47.5%                | 26.7%             |
|         | 1336            | 3.2%                    | 82.5%                | 14.3%             |
| F       | 1390            | 3.8%                    | 83.8%                | 12.3%             |
|         | 1527            | 16.9%                   | 56.8%                | 26.4%             |
|         | 1125            | 18.1%                   | 56.5%                | 25.4%             |
| G       | 477             | 44.0%                   | 44.8%                | 11.2%             |
|         | 4188            | 14.3%                   | 55.3%                | 30.4%             |
|         | 6412            | 15.7%                   | 54.3%                | 30.1%             |
| H       | 4996            | 8.6%                    | 61.3%                | 30.2%             |
|         | 335             | 22.3%                   | 67.7%                | 10.0%             |
|         | 1549            | 41.5%                   | 42.3%                | 16.2%             |
| G       | 87              | 69.2%                   | 21.4%                | 9.5%              |
|         | 82              | 72.9%                   | 17.8%                | 9.3%              |
|         | 85              | 70.3%                   | 20.3%                | 9.4%              |
|         | 84              | 71.2%                   | 19.4%                | 9.4%              |
|         | 82              | 72.9%                   | 17.8%                | 9.3%              |
|         | 3459            | 18.6%                   | 56.0%                | 25.4%             |
|         | 1202            | 21.4%                   | 52.7%                | 25.9%             |
|         | 1378            | 7.8%                    | 63.9%                | 28.4%             |
| H       | 1125            | 18.1%                   | 56.5%                | 25.4%             |
|         | 281             | 63.9%                   | 31.5%                | 4.6%              |
|         | 1471            | 7.3%                    | 79.7%                | 13.0%             |
| 1182    | 26.1%           | 64.4%                   | 9.5%                 |                   |
| Average |                 | 23.5%                   | 53.8%                | 22.6%             |

|      |      | Company Code |      |      |      |      |      |      |   |
|------|------|--------------|------|------|------|------|------|------|---|
|      |      | A            | B    | C    | D    | E    | F    | G    | H |
| Type | HPLC |              |      |      |      |      |      |      |   |
| AMGS | 4443 | 4517         | 863  | 1921 | 1527 | 6412 | 2330 | 1182 |   |
| Type | UPLC |              |      |      |      |      |      |      |   |
| AMGS | 3709 | 3213         | 2860 | 1336 | 1125 | 3577 | 1378 | 1471 |   |
| Type | SFC  |              |      |      |      |      |      |      |   |
| AMGS | 1053 | 881          | 476  | 1390 | 476  | 335  | 84   | 281  |   |

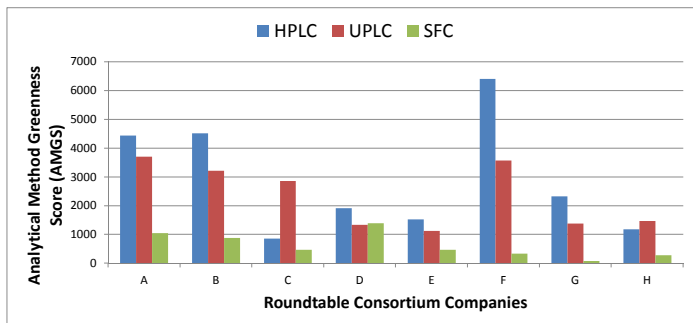



Method Number:

|                                                   |      |
|---------------------------------------------------|------|
| Technique:                                        | UPLC |
| Instrument energy (kV):                           | 0.9  |
| Number of analyses of interest:                   | 1    |
| Number of injections per (or) one (all) analysis: | 15   |

Greenness Score

3313.88

|                         |         |                      |
|-------------------------|---------|----------------------|
| Instrument Energy Score | 341.04  | % of greenness score |
| Solvent Energy Score    | 1872.13 | 56.5%                |
| Solvent EHS Score       | 1056.71 | 31.7%                |

|                                  |    |
|----------------------------------|----|
| Stock standard prep volume (mL): | 50 |
| Number of Stock standard preps:  | 2  |

| Stock standard diluent | Volume per prep | Density | EHS   | EHS Score per prep | EHS Score all preps | CE0/10 | Solvent Energy Score per prep | Solvent Energy Score all preps |
|------------------------|-----------------|---------|-------|--------------------|---------------------|--------|-------------------------------|--------------------------------|
| Solvent 1              | 25 mL           | 1.000   | 0.319 | 44.008             | 88.057              | 4.523  | 88.057                        | 177.757                        |
| Solvent 2              | 50 mL           | 1.000   | 0.639 | 15.995             | 31.990              | 0.077  | 15.995                        | 31.990                         |
| Solvent 3              | 0 mL            | 0.000   | 0.000 | 0.000              | 0.000               | 0.000  | 0.000                         | 0.000                          |

|                                    |     |
|------------------------------------|-----|
| Working Standard prep volume (mL): | 100 |
| Number of Working standard preps:  | 4   |

| Standard diluent | Volume per prep | Density | EHS   | EHS Score per prep | EHS Score all preps | CE0/10 | Solvent Energy Score per prep | Solvent Energy Score all preps |
|------------------|-----------------|---------|-------|--------------------|---------------------|--------|-------------------------------|--------------------------------|
| Solvent 1        | 50 mL           | 0.796   | 2.241 | 88.057             | 352.227             | 4.523  | 177.757                       | 711.028                        |
| Solvent 2        | 50 mL           | 1.000   | 0.319 | 15.995             | 63.818              | 0.077  | 3.846                         | 15.385                         |
| Solvent 3        | 0 mL            | 0.000   | 0.000 | 0.000              | 0.000               | 0.000  | 0.000                         | 0.000                          |

|                          |     |
|--------------------------|-----|
| Sample prep volume (mL): | 100 |
| Number of sample preps:  | 4   |

| Sample diluent | Volume per prep | Density | EHS   | EHS Score per prep | EHS Score all preps | CE0/10 | Solvent Energy Score per prep | Solvent Energy Score all preps |
|----------------|-----------------|---------|-------|--------------------|---------------------|--------|-------------------------------|--------------------------------|
| Solvent 1      | 50 mL           | 0.796   | 2.241 | 88.057             | 352.227             | 4.523  | 177.757                       | 711.028                        |
| Solvent 2      | 50 mL           | 1.000   | 0.319 | 15.995             | 63.818              | 0.077  | 3.846                         | 15.385                         |
| Solvent 3      | 0 mL            | 0.000   | 0.000 | 0.000              | 0.000               | 0.000  | 0.000                         | 0.000                          |

|                       |    |
|-----------------------|----|
| SST prep volume (mL): | 10 |
| Number of SST preps:  | 1  |

| SST diluent | Volume per prep | Density | EHS   | EHS Score per prep | EHS Score all preps | CE0/10 | Solvent Energy Score per prep | Solvent Energy Score all preps |
|-------------|-----------------|---------|-------|--------------------|---------------------|--------|-------------------------------|--------------------------------|
| Solvent 1   | 5 mL            | 0.796   | 2.241 | 8.806              | 8.806               | 4.523  | 1.77757                       | 17.776                         |
| Solvent 2   | 5 mL            | 1.000   | 0.319 | 3.998              | 3.998               | 0.077  | 0.385                         | 3.998                          |
| Solvent 3   | 0 mL            | 0.000   | 0.000 | 0.000              | 0.000               | 0.000  | 0.000                         | 0.000                          |

|                                    |     |
|------------------------------------|-----|
| Sensitivity Soln prep volume (mL): | 100 |
| Number of Sensitivity Soln preps:  | 1   |

| Sensitivity Soln prep | Volume per prep | Density | EHS   | EHS Score per prep | EHS Score all preps | CE0/10 | Solvent Energy Score per prep | Solvent Energy Score all preps |
|-----------------------|-----------------|---------|-------|--------------------|---------------------|--------|-------------------------------|--------------------------------|
| Solvent 1             | 50 mL           | 0.796   | 2.241 | 88.057             | 88.057              | 4.523  | 177.757                       | 177.757                        |
| Solvent 2             | 50 mL           | 1.000   | 0.319 | 15.995             | 15.995              | 0.077  | 3.846                         | 3.846                          |
| Solvent 3             | 0 mL            | 0.000   | 0.000 | 0.000              | 0.000               | 0.000  | 0.000                         | 0.000                          |

MOBILE PHASES

Mobile phase A

| Solvent   | Volume per injection | Density | EHS   | EHS Score per prep | EHS Score all preps | CE0/10 | Solvent Energy Score per injection | Solvent Energy Score all injections |
|-----------|----------------------|---------|-------|--------------------|---------------------|--------|------------------------------------|-------------------------------------|
| Solvent 1 | 6.88 mL              | 1.000   | 0.319 | 2.197              | 32.982              | 0.077  | 7.544                              | 7.544                               |
| Solvent 2 | 0.00 mL              | 0.000   | 0.000 | 0.000              | 0.000               | 0.000  | 0.000                              | 0.000                               |
| Solvent 3 | 0.00 mL              | 0.000   | 0.000 | 0.000              | 0.000               | 0.000  | 0.000                              | 0.000                               |

Mobile phase B

| Solvent   | Volume per injection | Density | EHS   | EHS Score per prep | EHS Score all preps | CE0/10 | Solvent Energy Score per injection | Solvent Energy Score all injections |
|-----------|----------------------|---------|-------|--------------------|---------------------|--------|------------------------------------|-------------------------------------|
| Solvent 1 | 0.95 mL              | 0.796   | 2.241 | 0.386              | 3.794               | 4.523  | 1.991                              | 29.863                              |
| Solvent 2 | 0.14 mL              | 0.792   | 0.272 | 0.030              | 0.453               | 0.077  | 0.099                              | 0.128                               |
| Solvent 3 | 0.00 mL              | 0.000   | 0.000 | 0.000              | 0.000               | 0.000  | 0.000                              | 0.000                               |

|                           |     |
|---------------------------|-----|
| Flow rate (mL/min):       | 0.7 |
| Run time (min/injection): | 16  |

| Gradient                           | %A   | %B | A    | B    |
|------------------------------------|------|----|------|------|
| 0                                  | 85   | 15 | 0.95 | 0.05 |
| 0.5                                | 85   | 15 | 4.82 | 0.05 |
| 1.2                                | 85   | 15 | 4.82 | 0.05 |
| 1.5                                | 85   | 15 | 4.82 | 0.05 |
| 1.6                                | 85   | 15 | 4.82 | 0.05 |
| 1.7                                | 85   | 15 | 4.82 | 0.05 |
| 1.8                                | 85   | 15 | 4.82 | 0.05 |
| 1.9                                | 85   | 15 | 4.82 | 0.05 |
| 2.0                                | 85   | 15 | 4.82 | 0.05 |
| 2.1                                | 85   | 15 | 4.82 | 0.05 |
| 2.2                                | 85   | 15 | 4.82 | 0.05 |
| 2.3                                | 85   | 15 | 4.82 | 0.05 |
| 2.4                                | 85   | 15 | 4.82 | 0.05 |
| 2.5                                | 85   | 15 | 4.82 | 0.05 |
| 2.6                                | 85   | 15 | 4.82 | 0.05 |
| 2.7                                | 85   | 15 | 4.82 | 0.05 |
| 2.8                                | 85   | 15 | 4.82 | 0.05 |
| 2.9                                | 85   | 15 | 4.82 | 0.05 |
| 3.0                                | 85   | 15 | 4.82 | 0.05 |
| 3.1                                | 85   | 15 | 4.82 | 0.05 |
| 3.2                                | 85   | 15 | 4.82 | 0.05 |
| 3.3                                | 85   | 15 | 4.82 | 0.05 |
| 3.4                                | 85   | 15 | 4.82 | 0.05 |
| 3.5                                | 85   | 15 | 4.82 | 0.05 |
| 3.6                                | 85   | 15 | 4.82 | 0.05 |
| 3.7                                | 85   | 15 | 4.82 | 0.05 |
| 3.8                                | 85   | 15 | 4.82 | 0.05 |
| 3.9                                | 85   | 15 | 4.82 | 0.05 |
| 4.0                                | 85   | 15 | 4.82 | 0.05 |
| 4.1                                | 85   | 15 | 4.82 | 0.05 |
| 4.2                                | 85   | 15 | 4.82 | 0.05 |
| 4.3                                | 85   | 15 | 4.82 | 0.05 |
| 4.4                                | 85   | 15 | 4.82 | 0.05 |
| 4.5                                | 85   | 15 | 4.82 | 0.05 |
| 4.6                                | 85   | 15 | 4.82 | 0.05 |
| 4.7                                | 85   | 15 | 4.82 | 0.05 |
| 4.8                                | 85   | 15 | 4.82 | 0.05 |
| 4.9                                | 85   | 15 | 4.82 | 0.05 |
| 5.0                                | 85   | 15 | 4.82 | 0.05 |
| 5.1                                | 85   | 15 | 4.82 | 0.05 |
| 5.2                                | 85   | 15 | 4.82 | 0.05 |
| 5.3                                | 85   | 15 | 4.82 | 0.05 |
| 5.4                                | 85   | 15 | 4.82 | 0.05 |
| 5.5                                | 85   | 15 | 4.82 | 0.05 |
| 5.6                                | 85   | 15 | 4.82 | 0.05 |
| 5.7                                | 85   | 15 | 4.82 | 0.05 |
| 5.8                                | 85   | 15 | 4.82 | 0.05 |
| 5.9                                | 85   | 15 | 4.82 | 0.05 |
| 6.0                                | 85   | 15 | 4.82 | 0.05 |
| 6.1                                | 85   | 15 | 4.82 | 0.05 |
| 6.2                                | 85   | 15 | 4.82 | 0.05 |
| 6.3                                | 85   | 15 | 4.82 | 0.05 |
| 6.4                                | 85   | 15 | 4.82 | 0.05 |
| 6.5                                | 85   | 15 | 4.82 | 0.05 |
| 6.6                                | 85   | 15 | 4.82 | 0.05 |
| 6.7                                | 85   | 15 | 4.82 | 0.05 |
| 6.8                                | 85   | 15 | 4.82 | 0.05 |
| 6.9                                | 85   | 15 | 4.82 | 0.05 |
| 7.0                                | 85   | 15 | 4.82 | 0.05 |
| 7.1                                | 85   | 15 | 4.82 | 0.05 |
| 7.2                                | 85   | 15 | 4.82 | 0.05 |
| 7.3                                | 85   | 15 | 4.82 | 0.05 |
| 7.4                                | 85   | 15 | 4.82 | 0.05 |
| 7.5                                | 85   | 15 | 4.82 | 0.05 |
| 7.6                                | 85   | 15 | 4.82 | 0.05 |
| 7.7                                | 85   | 15 | 4.82 | 0.05 |
| 7.8                                | 85   | 15 | 4.82 | 0.05 |
| 7.9                                | 85   | 15 | 4.82 | 0.05 |
| 8.0                                | 85   | 15 | 4.82 | 0.05 |
| 8.1                                | 85   | 15 | 4.82 | 0.05 |
| 8.2                                | 85   | 15 | 4.82 | 0.05 |
| 8.3                                | 85   | 15 | 4.82 | 0.05 |
| 8.4                                | 85   | 15 | 4.82 | 0.05 |
| 8.5                                | 85   | 15 | 4.82 | 0.05 |
| 8.6                                | 85   | 15 | 4.82 | 0.05 |
| 8.7                                | 85   | 15 | 4.82 | 0.05 |
| 8.8                                | 85   | 15 | 4.82 | 0.05 |
| 8.9                                | 85   | 15 | 4.82 | 0.05 |
| 9.0                                | 85   | 15 | 4.82 | 0.05 |
| 9.1                                | 85   | 15 | 4.82 | 0.05 |
| 9.2                                | 85   | 15 | 4.82 | 0.05 |
| 9.3                                | 85   | 15 | 4.82 | 0.05 |
| 9.4                                | 85   | 15 | 4.82 | 0.05 |
| 9.5                                | 85   | 15 | 4.82 | 0.05 |
| 9.6                                | 85   | 15 | 4.82 | 0.05 |
| 9.7                                | 85   | 15 | 4.82 | 0.05 |
| 9.8                                | 85   | 15 | 4.82 | 0.05 |
| 9.9                                | 85   | 15 | 4.82 | 0.05 |
| 10.0                               | 85   | 15 | 4.82 | 0.05 |
| Total MP volume per injection (mL) | 6.88 |    | 4.32 |      |

NOTES

Based on actual A&D Chrom/Assay method UPLC method using Waters Connex C18, 100mm x 2.1 mm ID, 1.6 micron particle

















Method Number: **UPLC**

|                                              |      |
|----------------------------------------------|------|
| Technique:                                   | UPLC |
| Instrument energy (kWh):                     | 0.9  |
| Number of analyses of interest:              | 1    |
| Number of injections per lot (all analysis): | 15   |

**Greenness Score 3212.86**

|                         |         |                      |
|-------------------------|---------|----------------------|
| Instrument Energy Score | 471.68  | % of greenness score |
| Solvent Energy Score    | 1904.92 | 14.7%                |
| Solvent EHS Score       | 836.26  | 59.3%                |
|                         |         | 25.0%                |

Stock standard prep volume (ml):

Number of Stock standard preps:

| Stock standard diluent             | Volume per prep | Density | EHS   | EHS Score per prep | EHS Score all preps | CEO/JO | Solvent Energy Score per prep | Solvent Energy Score all preps |
|------------------------------------|-----------------|---------|-------|--------------------|---------------------|--------|-------------------------------|--------------------------------|
| Solvent 1                          | 0 ml            | 0.000   | 0.000 | 0.000              | 0.000               | 0.000  | 0.000                         | 0.000                          |
| Solvent 2                          | 0 ml            | 0.000   | 0.000 | 0.000              | 0.000               | 0.000  | 0.000                         | 0.000                          |
| Solvent 3                          | 0 ml            | 0.000   | 0.000 | 0.000              | 0.000               | 0.000  | 0.000                         | 0.000                          |
| Working Standard prep volume (ml): | 100             |         |       |                    |                     |        |                               |                                |
| Number of working standard preps:  | 2               |         |       |                    |                     |        |                               |                                |

| Standard diluent | Volume per prep | Density | EHS   | EHS Score per prep | EHS Score all preps | CEO/JO | Solvent Energy Score per prep | Solvent Energy Score all preps |
|------------------|-----------------|---------|-------|--------------------|---------------------|--------|-------------------------------|--------------------------------|
| Solvent 1        | 50 ml           | 0.796   | 2.241 | 88.057             | 176.114             | 5.880  | 231.084                       | 462.168                        |
| Solvent 2        | 50 ml           | 1.000   | 0.219 | 15.995             | 31.990              | 0.001  | 0.950                         | 0.000                          |
| Solvent 3        | 0 ml            | 0.000   | 0.000 | 0.000              | 0.000               | 0.000  | 0.000                         | 0.000                          |

Sample prep volume (ml):

Number of sample preps:

| Sample diluent | Volume per prep | Density | EHS   | EHS Score per prep | EHS Score all preps | CEO/JO | Solvent Energy Score per prep | Solvent Energy Score all preps |
|----------------|-----------------|---------|-------|--------------------|---------------------|--------|-------------------------------|--------------------------------|
| Solvent 1      | 50 ml           | 0.796   | 2.241 | 88.057             | 176.114             | 5.880  | 231.084                       | 462.168                        |
| Solvent 2      | 50 ml           | 1.000   | 0.219 | 15.995             | 31.990              | 0.001  | 0.950                         | 0.000                          |
| Solvent 3      | 0 ml            | 0.000   | 0.000 | 0.000              | 0.000               | 0.000  | 0.000                         | 0.000                          |

SST prep volume (ml):

Number of SST preps:

| SST diluent | Volume per prep | Density | EHS   | EHS Score per prep | EHS Score all preps | CEO/JO | Solvent Energy Score per prep | Solvent Energy Score all preps |
|-------------|-----------------|---------|-------|--------------------|---------------------|--------|-------------------------------|--------------------------------|
| Solvent 1   | 50 ml           | 0.796   | 2.241 | 88.057             | 88.057              | 5.880  | 231.084                       | 231.084                        |
| Solvent 2   | 50 ml           | 1.000   | 0.219 | 15.995             | 15.995              | 0.001  | 0.950                         | 0.950                          |
| Solvent 3   | 0 ml            | 0.000   | 0.000 | 0.000              | 0.000               | 0.000  | 0.000                         | 0.000                          |

Sensitivity Soln prep volume (ml):

Number of Sensitivity Soln preps:

| Sensitivity Soln prep | Volume per prep | Density | EHS   | EHS Score per prep | EHS Score all preps | CEO/JO | Solvent Energy Score per prep | Solvent Energy Score all preps |
|-----------------------|-----------------|---------|-------|--------------------|---------------------|--------|-------------------------------|--------------------------------|
| Solvent 1             | 75 ml           | 0.796   | 2.241 | 132.085            | 132.085             | 5.880  | 346.626                       | 346.626                        |
| Solvent 2             | 0 ml            | 0.000   | 0.000 | 0.000              | 0.000               | 0.000  | 0.000                         | 0.000                          |
| Solvent 3             | 0 ml            | 0.000   | 0.000 | 0.000              | 0.000               | 0.000  | 0.000                         | 0.000                          |

Mobile phase A

| Solvent   | Volume per injection | Density | EHS   | EHS Score per prep | EHS Score all preps | CEO/JO | Solvent Energy Score per injection | Solvent Energy Score all injections |
|-----------|----------------------|---------|-------|--------------------|---------------------|--------|------------------------------------|-------------------------------------|
| Solvent 1 | 6.18 ml              | 1.000   | 0.219 | 1.971              | 29.568              | 0.001  | 0.006                              | 0.093                               |
| Solvent 2 | 0.34 ml              | 0.796   | 2.241 | 0.593              | 8.901               | 5.880  | 1.557                              | 21.360                              |
| Solvent 3 | 0.51 ml              | 0.792   | 0.277 | 0.109              | 1.635               | 1.850  | 0.741                              | 11.109                              |

Mobile phase B

| Solvent   | Volume per injection | Density | EHS   | EHS Score per prep | EHS Score all preps | CEO/JO | Solvent Energy Score per injection | Solvent Energy Score all injections |
|-----------|----------------------|---------|-------|--------------------|---------------------|--------|------------------------------------|-------------------------------------|
| Solvent 1 | 1.59 ml              | 1.000   | 0.219 | 0.516              | 7.596               | 0.001  | 0.007                              | 248.577                             |
| Solvent 2 | 34 ml                | 0.796   | 2.241 | 6335               | 5927                | 5.880  | 18675                              | 118.959                             |
| Solvent 3 | 540 ml               | 0.792   | 0.277 | 1169               | 17458               | 1.850  | 7386                               |                                     |

Flow rate (ml/min):

Run time (min/injection):

| Gradient | Time (min) | %A  | %B | A     | B    | MIP volume per gradient step (ml) |
|----------|------------|-----|----|-------|------|-----------------------------------|
| 0        | 60         | 40  | 60 | 0.26  | 0.32 |                                   |
| 1        | 45         | 40  | 60 | 4.18  | 5.10 |                                   |
| 16       | 10         | 90  | 10 | 1.10  | 2.90 |                                   |
| 20       | 10         | 90  | 10 | 0.32  | 2.88 |                                   |
| 20.2     | 60         | 40  | 60 | 0.06  | 0.10 |                                   |
| 22       | 60         | 40  | 60 | 0.96  | 0.58 |                                   |
|          | 40         | 60  | 40 | 0.49  | 0.49 |                                   |
|          | 100        | 100 | 0  | 0.00  | 0.00 |                                   |
|          | 100        | 100 | 0  | 0.00  | 0.00 |                                   |
|          | 7.02       |     |    | 10.58 |      |                                   |

**INSTRUMENT CONDITIONS**

**MOBILE PHASES**

**SENSITIVITY**

**SST**

**SAMPLE**

**STANDARDS**

**METHOD**

**NOTES**

Sensitivity assumptions:  
Sensitivity Check solution 1 prepared by diluting 1 ml of standard into 100 ml  
Sensitivity Check solution 2 prepared by diluting 5 ml of solution 1 into 50 ml  
Total: 150 ml

Injection assumptions: Blank x2, Sensitivity x2, Blank x1, SST x1, Std 1 x6, Std 2 x1, Sample wt1 x1, Sample wt2 x1, Std 1 x1, SST x1, Total: 17













Greenness Score **2347.05**

| Instrument Energy Score |        | % of greenness score |  |
|-------------------------|--------|----------------------|--|
| Instrument Energy Score | 747.04 | 31.8%                |  |
| Solvent Energy Score    | 792.88 | 32.9%                |  |
| Solvent EHS Score       | 807.13 | 33.7%                |  |

| Method Number:                              |      | HPLC |  |
|---------------------------------------------|------|------|--|
| Technique:                                  | HPLC |      |  |
| Instrument energy (MJ):                     | 1.0  |      |  |
| Number of analyses of interest:             | 1    |      |  |
| Number of injections run for each analysis: | 15   |      |  |

| Stock standard prep volume (ml): |   | 100 |  |
|----------------------------------|---|-----|--|
| Number of Stock standard preps:  | 1 |     |  |

| Stock standard diluent | Volume per prep | Density | EHS   | EHS Score per prep | EHS Score all preps | CE0/10 | Solvent Energy Score per prep | Solvent Energy Score all preps |
|------------------------|-----------------|---------|-------|--------------------|---------------------|--------|-------------------------------|--------------------------------|
| Solvent 1              | 100 mL          | 1.000   | 0.319 | 31.909             | 31.909              | 0.000  | 0.100                         | 0.100                          |
| Solvent 2              | 0 mL            | 0.000   | 0.000 | 0.000              | 0.000               | 0.000  | 0.000                         | 0.000                          |
| Solvent 3              | 0 mL            | 0.000   | 0.000 | 0.000              | 0.000               | 0.000  | 0.000                         | 0.000                          |

| Working Standard prep volume (ml): |   | 100 |  |
|------------------------------------|---|-----|--|
| Number of Working standard preps:  | 2 |     |  |

| Standard diluent | Volume per prep | Density | EHS   | EHS Score per prep | EHS Score all preps | CE0/10 | Solvent Energy Score per prep | Solvent Energy Score all preps |
|------------------|-----------------|---------|-------|--------------------|---------------------|--------|-------------------------------|--------------------------------|
| Solvent 1        | 100 mL          | 1.000   | 0.319 | 31.909             | 63.818              | 5.880  | 0.100                         | 0.200                          |
| Solvent 2        | 0 mL            | 0.796   | 2.241 | 0.000              | 0.000               | 0.000  | 0.000                         | 0.000                          |
| Solvent 3        | 0 mL            | 0.000   | 0.000 | 0.000              | 0.000               | 0.000  | 0.000                         | 0.000                          |

| Sample prep volume (ml): |   | 500 |  |
|--------------------------|---|-----|--|
| Number of sample preps:  | 2 |     |  |

| Sample diluent | Volume per prep | Density | EHS   | EHS Score per prep | EHS Score all preps | CE0/10 | Solvent Energy Score per prep | Solvent Energy Score all preps |
|----------------|-----------------|---------|-------|--------------------|---------------------|--------|-------------------------------|--------------------------------|
| Solvent 1      | 500 mL          | 1.000   | 0.319 | 159.546            | 319.092             | 0.001  | 0.500                         | 1.000                          |
| Solvent 2      | 0 mL            | 0.796   | 2.241 | 0.000              | 0.000               | 5.880  | 0.000                         | 0.000                          |
| Solvent 3      | 0 mL            | 0.000   | 0.000 | 0.000              | 0.000               | 0.000  | 0.000                         | 0.000                          |

| SST prep volume (ml): |   | 50 |  |
|-----------------------|---|----|--|
| Number of SST preps:  | 1 |    |  |

| SST diluent | Volume per prep | Density | EHS   | EHS Score per prep | EHS Score all preps | CE0/10 | Solvent Energy Score per prep | Solvent Energy Score all preps |
|-------------|-----------------|---------|-------|--------------------|---------------------|--------|-------------------------------|--------------------------------|
| Solvent 1   | 50 mL           | 1.000   | 0.319 | 15.955             | 15.955              | 0.001  | 0.050                         | 0.050                          |
| Solvent 2   | 0 mL            | 0.000   | 0.000 | 0.000              | 0.000               | 0.000  | 0.000                         | 0.000                          |
| Solvent 3   | 0 mL            | 0.000   | 0.000 | 0.000              | 0.000               | 0.000  | 0.000                         | 0.000                          |

| Sensitivity Soln prep volume (ml): |   | 95 |  |
|------------------------------------|---|----|--|
| Number of Sensitivity Soln preps:  | 1 |    |  |

| Sensitivity Soln | Volume per prep | Density | EHS   | EHS Score per prep | EHS Score all preps | CE0/10 | Solvent Energy Score per prep | Solvent Energy Score all preps |
|------------------|-----------------|---------|-------|--------------------|---------------------|--------|-------------------------------|--------------------------------|
| Solvent 1        | 90.25 mL        | 1.000   | 0.319 | 28.798             | 28.798              | 0.001  | 0.090                         | 0.090                          |
| Solvent 2        | 4.75 mL         | 0.796   | 2.241 | 0.000              | 0.000               | 0.000  | 0.000                         | 0.000                          |
| Solvent 3        | 0 mL            | 0.000   | 0.000 | 0.000              | 0.000               | 0.000  | 0.000                         | 0.000                          |

| Mobile phase A |              | Percent |  |
|----------------|--------------|---------|--|
| Solvent 1      | Water        | 100     |  |
| Solvent 2      | Acetonitrile | 0       |  |
| Solvent 3      |              | 0       |  |

| Solvent   | Volume per injection | Density | EHS   | EHS Score per prep | EHS Score all preps | CE0/10 | Solvent Energy Score per injection | Solvent Energy Score all injections |
|-----------|----------------------|---------|-------|--------------------|---------------------|--------|------------------------------------|-------------------------------------|
| Solvent 1 | 17.16 mL             | 1.000   | 0.319 | 5.474              | 82.113              | 0.001  | 0.017                              | 0.257                               |
| Solvent 2 | 0.00 mL              | 0.000   | 0.000 | 0.000              | 0.000               | 0.000  | 0.000                              | 0.000                               |
| Solvent 3 | 0.00 mL              | 0.000   | 0.000 | 0.000              | 0.000               | 0.000  | 0.000                              | 0.000                               |

| Mobile phase B |              | Percent |  |
|----------------|--------------|---------|--|
| Solvent 1      | Acetonitrile | 90      |  |
| Solvent 2      | Water        | 10      |  |
| Solvent 3      |              | 0       |  |

| Solvent   | Volume per injection | Density | EHS   | EHS Score per prep | EHS Score all preps | CE0/10 | Solvent Energy Score per injection | Solvent Energy Score all injections |
|-----------|----------------------|---------|-------|--------------------|---------------------|--------|------------------------------------|-------------------------------------|
| Solvent 1 | 10.66 mL             | 0.796   | 2.241 | 18.774             | 281.607             | 5.880  | 482.67                             | 739.010                             |
| Solvent 2 | 1.88 mL              | 1.000   | 0.319 | 0.378              | 5.669               | 0.001  | 0.001                              | 0.008                               |
| Solvent 3 | 0.00 mL              | 0.000   | 0.000 | 0.000              | 0.000               | 0.000  | 0.000                              | 0.000                               |

| Flow rate (ml/min):   |    | 1 |  |
|-----------------------|----|---|--|
| Number of injections: | 29 |   |  |

| Run time (min/injection): |  | 29 |  |
|---------------------------|--|----|--|
|---------------------------|--|----|--|

| Gradient | Time (min) | %A  | %B | A                                  | B     |
|----------|------------|-----|----|------------------------------------|-------|
|          | 0          | 64  | 36 | 1.76                               | 0.72  |
|          | 20         | 53  | 46 | 10.43                              | 3.74  |
|          | 20.1       | 52  | 45 | 0.03                               | 0.07  |
|          | 21         | 51  | 45 | 0.04                               | 0.85  |
|          | 21.1       | 64  | 36 | 0.03                               | 0.07  |
|          | 29         | 64  | 36 | 5.96                               | 2.84  |
|          | 30         | 64  | 36 | 0.00                               | 0.00  |
|          | 100        | 100 | 0  | 0.00                               | 0.00  |
|          |            |     |    | Total MP volume per injection (ml) | 11.84 |
|          |            |     |    |                                    | 17.16 |

| Instrument Conditions |  | MP volume per gradient step (ml)   |       |
|-----------------------|--|------------------------------------|-------|
|                       |  | A                                  | B     |
|                       |  | 1.76                               | 0.72  |
|                       |  | 10.43                              | 3.74  |
|                       |  | 0.03                               | 0.07  |
|                       |  | 0.04                               | 0.85  |
|                       |  | 0.03                               | 0.07  |
|                       |  | 5.96                               | 2.84  |
|                       |  | 0.00                               | 0.00  |
|                       |  | 0.00                               | 0.00  |
|                       |  | Total MP volume per injection (ml) | 11.84 |
|                       |  |                                    | 17.16 |

Method is assay and degradation products method (analysis = 91)

Mobile phase additive is ~10 mM Ammonium acetate

Az150 is on a low level (entry standard which isn't captured specifically in the above table. It is prepared in the same volumes as the sensitivity standard, so I have added an extra preparation there to account for this.

Phase 3 validated

NOTES

| Method Number:                                  |     | HPLC |  |
|-------------------------------------------------|-----|------|--|
| Technique:                                      |     |      |  |
| Instrument energy (kWh):                        | 1.0 |      |  |
| Number of analyses of interest:                 | 1   |      |  |
| Number of injections per lot (or per analysis): | 15  |      |  |

| Greenness Score         |        | 1495.51              |  |
|-------------------------|--------|----------------------|--|
| Instrument Energy Score | 386.40 | % of greenness score |  |
| Solvent Energy Score    | 709.72 | 25.8%                |  |
| Solvent EHS Score       | 399.39 | 47.5%                |  |
|                         |        | 26.7%                |  |

| Stock standard prep volume (ml): |   | 25 |  |
|----------------------------------|---|----|--|
| Number of Stock standard preps:  | 2 |    |  |

| Stock standard diluent | Percent | Volume per prep | Density | EHS   | EHS Score per prep | EHS Score all preps | CEQ/DJ | Solvent Energy Score per prep | Solvent Energy Score all preps |
|------------------------|---------|-----------------|---------|-------|--------------------|---------------------|--------|-------------------------------|--------------------------------|
| Solvent 1              | 50      | 12.5 mL         | 1.000   | 0.772 | 2.696              | 5.392               | 1.850  | 18.315                        | 36.630                         |
| Solvent 2              | 50      | 12.5 mL         | 1.000   | 0.786 | 3.989              | 7.977               | 0.001  | 0.013                         | 0.025                          |
| Solvent 3              | 0       | 0 mL            | 0.000   | 0.000 | 0.000              | 0.000               | 0.000  | 0.000                         | 0.000                          |

| Working Standard prep volume (ml): |   | 2 |  |
|------------------------------------|---|---|--|
| Number of Working standard preps:  | 1 |   |  |

| Standard diluent | Percent | Volume per prep | Density | EHS   | EHS Score per prep | EHS Score all preps | CEQ/DJ | Solvent Energy Score per prep | Solvent Energy Score all preps |
|------------------|---------|-----------------|---------|-------|--------------------|---------------------|--------|-------------------------------|--------------------------------|
| Solvent 1        | 50      | 1 mL            | 1.000   | 0.319 | 0.319              | 0.319               | 1.761  | 4.622                         | 4.622                          |
| Solvent 2        | 50      | 1 mL            | 0.786   | 0.241 | 1.761              | 1.761               | 0.000  | 0.000                         | 0.000                          |
| Solvent 3        | 0       | 0 mL            | 0.000   | 0.000 | 0.000              | 0.000               | 0.000  | 0.000                         | 0.000                          |

| Sample prep volume (ml): |   | 100 |  |
|--------------------------|---|-----|--|
| Number of sample preps:  | 1 |     |  |

| Sample diluent | Percent | Volume per prep | Density | EHS   | EHS Score per prep | EHS Score all preps | CEQ/DJ | Solvent Energy Score per prep | Solvent Energy Score all preps |
|----------------|---------|-----------------|---------|-------|--------------------|---------------------|--------|-------------------------------|--------------------------------|
| Solvent 1      | 50      | 50 mL           | 1.000   | 0.319 | 15.955             | 15.955              | 0.001  | 0.050                         | 0.050                          |
| Solvent 2      | 50      | 50 mL           | 0.786   | 2.241 | 88.057             | 88.057              | 5.880  | 231.084                       | 231.084                        |
| Solvent 3      | 0       | 0 mL            | 0.000   | 0.000 | 0.000              | 0.000               | 0.000  | 0.000                         | 0.000                          |

| SST prep volume (ml): |   | 25 |  |
|-----------------------|---|----|--|
| Number of SST preps:  | 1 |    |  |

| SST diluent | Percent | Volume per prep | Density | EHS   | EHS Score per prep | EHS Score all preps | CEQ/DJ | Solvent Energy Score per prep | Solvent Energy Score all preps |
|-------------|---------|-----------------|---------|-------|--------------------|---------------------|--------|-------------------------------|--------------------------------|
| Solvent 1   | 60      | 15 mL           | 1.000   | 0.319 | 4.786              | 4.786               | 0.001  | 0.015                         | 0.015                          |
| Solvent 2   | 40      | 10 mL           | 0.786   | 2.241 | 17.611             | 17.611              | 5.880  | 46.217                        | 46.217                         |
| Solvent 3   | 0       | 0 mL            | 0.000   | 0.000 | 0.000              | 0.000               | 0.000  | 0.000                         | 0.000                          |

| Sensitivity Soln prep volume (ml): |   | 100 |  |
|------------------------------------|---|-----|--|
| Number of Sensitivity Soln preps:  | 2 |     |  |

| Sensitivity Soln | Percent | Volume per prep | Density | EHS   | EHS Score per prep | EHS Score all preps | CEQ/DJ | Solvent Energy Score per prep | Solvent Energy Score all preps |
|------------------|---------|-----------------|---------|-------|--------------------|---------------------|--------|-------------------------------|--------------------------------|
| Solvent 1        | 100     | 100 mL          | 1.000   | 0.319 | 31.909             | 63.818              | 0.001  | 0.100                         | 0.200                          |
| Solvent 2        | 0       | 0 mL            | 0.000   | 0.000 | 0.000              | 0.000               | 0.000  | 0.000                         | 0.000                          |
| Solvent 3        | 0       | 0 mL            | 0.000   | 0.000 | 0.000              | 0.000               | 0.000  | 0.000                         | 0.000                          |

MOBILE PHASES

| Mobile phase A |       | Percent |         | Volume per injection |       | Density |       | EHS   |        | EHS Score per prep |       | EHS Score all preps |       | CEQ/DJ |       | Solvent Energy Score per injection |       | Solvent Energy Score all injections |       |
|----------------|-------|---------|---------|----------------------|-------|---------|-------|-------|--------|--------------------|-------|---------------------|-------|--------|-------|------------------------------------|-------|-------------------------------------|-------|
| Solvent 1      | Water | 100     | 8.74 mL | 0.000 mL             | 1.000 | 0.319   | 0.000 | 2.786 | 41.821 | 0.001              | 0.000 | 0.131               | 0.000 | 0.000  | 0.000 | 0.000                              | 0.000 | 0.000                               | 0.000 |
| Solvent 2      | Water | 100     | 8.74 mL | 0.000 mL             | 1.000 | 0.319   | 0.000 | 2.786 | 41.821 | 0.001              | 0.000 | 0.131               | 0.000 | 0.000  | 0.000 | 0.000                              | 0.000 | 0.000                               | 0.000 |
| Solvent 3      | Water | 100     | 8.74 mL | 0.000 mL             | 1.000 | 0.319   | 0.000 | 2.786 | 41.821 | 0.001              | 0.000 | 0.131               | 0.000 | 0.000  | 0.000 | 0.000                              | 0.000 | 0.000                               | 0.000 |

| Mobile phase B |              | Percent |         | Volume per injection |       | Density |       | EHS   |         | EHS Score per prep |       | EHS Score all preps |         | CEQ/DJ |       | Solvent Energy Score per injection |         | Solvent Energy Score all injections |       |
|----------------|--------------|---------|---------|----------------------|-------|---------|-------|-------|---------|--------------------|-------|---------------------|---------|--------|-------|------------------------------------|---------|-------------------------------------|-------|
| Solvent 1      | Acetonitrile | 90      | 5.64 mL | 0.000 mL             | 0.786 | 2.241   | 0.786 | 9.916 | 148.893 | 0.001              | 0.001 | 5.880               | 280.049 | 0.001  | 0.009 | 0.009                              | 390.734 | 0.009                               | 0.009 |
| Solvent 2      | Water        | 10      | 0.63 mL | 0.000 mL             | 1.000 | 0.319   | 1.000 | 0.240 | 0.297   | 0.001              | 0.001 | 0.009               | 0.009   | 0.001  | 0.009 | 0.009                              | 0.009   | 0.009                               | 0.009 |
| Solvent 3      | Water        | 10      | 0.63 mL | 0.000 mL             | 1.000 | 0.319   | 1.000 | 0.240 | 0.297   | 0.001              | 0.001 | 0.009               | 0.009   | 0.001  | 0.009 | 0.009                              | 0.009   | 0.009                               | 0.009 |

| Flow rate (ml/min):       |    | 1 |  |
|---------------------------|----|---|--|
| Run time (min/injection): | 15 |   |  |

| Gradient                           | Time (min) | %A | %B | A    | B    | MP volume per gradient step (ml) |
|------------------------------------|------------|----|----|------|------|----------------------------------|
| 0                                  | 0          | 95 | 5  | 0.95 | 0.05 |                                  |
| 1                                  | 1          | 95 | 5  | 0.95 | 0.05 |                                  |
| 2                                  | 5          | 95 | 5  | 0.95 | 0.05 |                                  |
| 3                                  | 10         | 95 | 5  | 0.95 | 0.05 |                                  |
| 4                                  | 12.25      | 95 | 5  | 0.95 | 0.05 |                                  |
| 5                                  | 12.25      | 95 | 5  | 0.13 | 0.13 |                                  |
| 6                                  | 15         | 95 | 5  | 2.61 | 0.14 |                                  |
| 7                                  | 15         | 95 | 5  | 0.00 | 0.00 |                                  |
| 8                                  | 15         | 95 | 5  | 0.00 | 0.00 |                                  |
| 9                                  | 15         | 95 | 5  | 0.00 | 0.00 |                                  |
| 10                                 | 15         | 95 | 5  | 0.00 | 0.00 |                                  |
| 11                                 | 15         | 95 | 5  | 0.00 | 0.00 |                                  |
| 12                                 | 15         | 95 | 5  | 0.00 | 0.00 |                                  |
| 13                                 | 15         | 95 | 5  | 0.00 | 0.00 |                                  |
| 14                                 | 15         | 95 | 5  | 0.00 | 0.00 |                                  |
| 15                                 | 15         | 95 | 5  | 0.00 | 0.00 |                                  |
| Total MP volume per injection (ml) |            |    |    | 6.26 |      |                                  |

| Instrument Conditions            |   | 100 |  |
|----------------------------------|---|-----|--|
| Number of Instrument Conditions: | 1 |     |  |

NOTES

Method is assay and degradation products method (analysis = 91)  
 Mobile phase additive is ~10 mM Ammonium acetate  
 Az150 is on a low level (energy standard which isn't captured specifically in the above table. It is prepared in the same volumes as the sensitivity standard, so I have added an extra preparation there to account for this.  
 Phase 3 validated

Method Number:

|                                             |      |
|---------------------------------------------|------|
| Technique:                                  | UPLC |
| Instrument energy (kW):                     | 0.9  |
| Number of analyses of interest:             | 1    |
| Number of injections/run for each analysis: | 15   |

Greenness Score

1336.23

|                         |         |                      |
|-------------------------|---------|----------------------|
| Instrument Energy Score | 4288    | % of greenness score |
| Solvent Energy Score    | 1101.96 | 82.5%                |
| Solvent EHS Score       | 193.197 | 14.3%                |

|                                  |     |
|----------------------------------|-----|
| Stock standard prep volume (mL): | 100 |
| Number of Stock standard preps:  | 2   |

| Stock standard diluent | Volume per prep | Density | EHS   | EHS Score per prep | EHS Score all preps | CEO/10 | Solvent Energy Score per prep | Solvent Energy Score all preps |
|------------------------|-----------------|---------|-------|--------------------|---------------------|--------|-------------------------------|--------------------------------|
| Solvent 1              | 95 mL           | 0.792   | 0.272 | 20.491             | 40.982              | 1.850  | 139.194                       | 278.388                        |
| Solvent 2              | 5 mL            | 1.000   | 0.319 | 1.595              | 3.191               | 0.001  | 0.005                         | 0.010                          |
| Solvent 3              | 0 mL            | 0.000   | 0.000 | 0.000              | 0.000               | 0.000  | 0.000                         | 0.000                          |

|                                    |     |
|------------------------------------|-----|
| Working Standard prep volume (mL): | 100 |
| Number of Working standard preps:  | 2   |

| Standard diluent | Volume per prep | Density | EHS   | EHS Score per prep | EHS Score all preps | CEO/10 | Solvent Energy Score per prep | Solvent Energy Score all preps |
|------------------|-----------------|---------|-------|--------------------|---------------------|--------|-------------------------------|--------------------------------|
| Solvent 1        | 95 mL           | 0.792   | 0.272 | 20.491             | 40.982              | 1.850  | 139.194                       | 278.388                        |
| Solvent 2        | 5 mL            | 1.000   | 0.319 | 1.595              | 3.191               | 0.001  | 0.005                         | 0.010                          |
| Solvent 3        | 0 mL            | 0.000   | 0.000 | 0.000              | 0.000               | 0.000  | 0.000                         | 0.000                          |

|                          |     |
|--------------------------|-----|
| Sample prep volume (mL): | 100 |
| Number of sample preps:  | 2   |

| Sample diluent | Volume per prep | Density | EHS   | EHS Score per prep | EHS Score all preps | CEO/10 | Solvent Energy Score per prep | Solvent Energy Score all preps |
|----------------|-----------------|---------|-------|--------------------|---------------------|--------|-------------------------------|--------------------------------|
| Solvent 1      | 95 mL           | 0.792   | 0.272 | 20.491             | 40.982              | 1.850  | 139.194                       | 278.388                        |
| Solvent 2      | 5 mL            | 1.000   | 0.319 | 1.595              | 3.191               | 0.001  | 0.005                         | 0.010                          |
| Solvent 3      | 0 mL            | 0.000   | 0.000 | 0.000              | 0.000               | 0.000  | 0.000                         | 0.000                          |

|                       |    |
|-----------------------|----|
| SST prep volume (mL): | 50 |
| Number of SST preps:  | 1  |

| SST diluent | Volume per prep | Density | EHS   | EHS Score per prep | EHS Score all preps | CEO/10 | Solvent Energy Score per prep | Solvent Energy Score all preps |
|-------------|-----------------|---------|-------|--------------------|---------------------|--------|-------------------------------|--------------------------------|
| Solvent 1   | 47.5 mL         | 0.792   | 0.272 | 10.246             | 10.246              | 1.850  | 69.597                        | 69.597                         |
| Solvent 2   | 2.5 mL          | 1.000   | 0.319 | 0.798              | 0.798               | 0.001  | 0.005                         | 0.005                          |
| Solvent 3   | 0 mL            | 0.000   | 0.000 | 0.000              | 0.000               | 0.000  | 0.000                         | 0.000                          |

|                                    |     |
|------------------------------------|-----|
| Sensitivity Soln prep volume (mL): | 100 |
| Number of Sensitivity Soln preps:  | 1   |

| Sensitivity Soln prep volume (mL) | Volume per prep | Density | EHS   | EHS Score per prep | EHS Score all preps | CEO/10 | Solvent Energy Score per prep | Solvent Energy Score all preps |
|-----------------------------------|-----------------|---------|-------|--------------------|---------------------|--------|-------------------------------|--------------------------------|
| Solvent 1                         | 95 mL           | 0.792   | 0.272 | 20.491             | 20.491              | 1.850  | 139.194                       | 139.194                        |
| Solvent 2                         | 5 mL            | 1.000   | 0.319 | 1.595              | 1.595               | 0.001  | 0.005                         | 0.005                          |
| Solvent 3                         | 0 mL            | 0.000   | 0.000 | 0.000              | 0.000               | 0.000  | 0.000                         | 0.000                          |

Mobile phase A

| Solvent   | Volume per injection | Density | EHS   | EHS Score per prep | EHS Score all preps | CEO/10 | Solvent Energy Score per injection | Solvent Energy Score all injections |
|-----------|----------------------|---------|-------|--------------------|---------------------|--------|------------------------------------|-------------------------------------|
| Solvent 1 | 0.76 mL              | 1.000   | 0.319 | 0.244              | 0.244               | 0.001  | 0.001                              | 0.011                               |
| Solvent 2 | 0.00 mL              | 0.000   | 0.000 | 0.000              | 0.000               | 0.000  | 0.000                              | 0.000                               |
| Solvent 3 | 0.00 mL              | 0.000   | 0.000 | 0.000              | 0.000               | 0.000  | 0.000                              | 0.000                               |

Mobile phase B

| Solvent   | Volume per injection | Density | EHS   | EHS Score per prep | EHS Score all preps | CEO/10 | Solvent Energy Score per injection | Solvent Energy Score all injections |
|-----------|----------------------|---------|-------|--------------------|---------------------|--------|------------------------------------|-------------------------------------|
| Solvent 1 | 0.84 mL              | 0.796   | 2.241 | 1.472              | 22.085              | 5.880  | 3.864                              | 57.956                              |
| Solvent 2 | 0.00 mL              | 0.000   | 0.000 | 0.000              | 0.000               | 0.000  | 0.000                              | 0.000                               |
| Solvent 3 | 0.00 mL              | 0.000   | 0.000 | 0.000              | 0.000               | 0.000  | 0.000                              | 0.000                               |

Flow rate (mL/min): 0.8

Run time (min/injection): 2

| Gradient | Time (min) | %A  | %B   | A     | B     | MIP volume per gradient step (mL) | Total MIP volume per injection (mL) |
|----------|------------|-----|------|-------|-------|-----------------------------------|-------------------------------------|
| 0        | 0          | 95  | 5    | 0.261 | 0.014 | 0.275                             | 0.275                               |
| 1        | 1.5        | 2   | 98   | 0.143 | 0.014 | 0.157                             | 0.432                               |
| 2        | 1.9        | 98  | 5    | 0.044 | 0.044 | 0.088                             | 0.520                               |
| 3        | 5          | 95  | 5    | 0.08  | 0.00  | 0.08                              | 0.600                               |
| 4        | 100        | 100 | 0.00 | 0.00  | 0.00  | 0.00                              | 0.600                               |
| 5        | 100        | 100 | 0.00 | 0.00  | 0.00  | 0.00                              | 0.600                               |
| 6        | 100        | 100 | 0.00 | 0.00  | 0.00  | 0.00                              | 0.600                               |
| 7        | 100        | 100 | 0.00 | 0.00  | 0.00  | 0.00                              | 0.600                               |
| 8        | 100        | 100 | 0.00 | 0.00  | 0.00  | 0.00                              | 0.600                               |
| 9        | 100        | 100 | 0.00 | 0.00  | 0.00  | 0.00                              | 0.600                               |
| 10       | 100        | 100 | 0.00 | 0.00  | 0.00  | 0.00                              | 0.600                               |
| 11       | 100        | 100 | 0.00 | 0.00  | 0.00  | 0.00                              | 0.600                               |
| 12       | 100        | 100 | 0.00 | 0.00  | 0.00  | 0.00                              | 0.600                               |
| 13       | 100        | 100 | 0.00 | 0.00  | 0.00  | 0.00                              | 0.600                               |
| 14       | 100        | 100 | 0.00 | 0.00  | 0.00  | 0.00                              | 0.600                               |
| 15       | 100        | 100 | 0.00 | 0.00  | 0.00  | 0.00                              | 0.600                               |
| 16       | 100        | 100 | 0.00 | 0.00  | 0.00  | 0.00                              | 0.600                               |
| 17       | 100        | 100 | 0.00 | 0.00  | 0.00  | 0.00                              | 0.600                               |
| 18       | 100        | 100 | 0.00 | 0.00  | 0.00  | 0.00                              | 0.600                               |
| 19       | 100        | 100 | 0.00 | 0.00  | 0.00  | 0.00                              | 0.600                               |
| 20       | 100        | 100 | 0.00 | 0.00  | 0.00  | 0.00                              | 0.600                               |
| 21       | 100        | 100 | 0.00 | 0.00  | 0.00  | 0.00                              | 0.600                               |
| 22       | 100        | 100 | 0.00 | 0.00  | 0.00  | 0.00                              | 0.600                               |
| 23       | 100        | 100 | 0.00 | 0.00  | 0.00  | 0.00                              | 0.600                               |
| 24       | 100        | 100 | 0.00 | 0.00  | 0.00  | 0.00                              | 0.600                               |
| 25       | 100        | 100 | 0.00 | 0.00  | 0.00  | 0.00                              | 0.600                               |
| 26       | 100        | 100 | 0.00 | 0.00  | 0.00  | 0.00                              | 0.600                               |
| 27       | 100        | 100 | 0.00 | 0.00  | 0.00  | 0.00                              | 0.600                               |
| 28       | 100        | 100 | 0.00 | 0.00  | 0.00  | 0.00                              | 0.600                               |
| 29       | 100        | 100 | 0.00 | 0.00  | 0.00  | 0.00                              | 0.600                               |
| 30       | 100        | 100 | 0.00 | 0.00  | 0.00  | 0.00                              | 0.600                               |
| 31       | 100        | 100 | 0.00 | 0.00  | 0.00  | 0.00                              | 0.600                               |
| 32       | 100        | 100 | 0.00 | 0.00  | 0.00  | 0.00                              | 0.600                               |
| 33       | 100        | 100 | 0.00 | 0.00  | 0.00  | 0.00                              | 0.600                               |
| 34       | 100        | 100 | 0.00 | 0.00  | 0.00  | 0.00                              | 0.600                               |
| 35       | 100        | 100 | 0.00 | 0.00  | 0.00  | 0.00                              | 0.600                               |
| 36       | 100        | 100 | 0.00 | 0.00  | 0.00  | 0.00                              | 0.600                               |
| 37       | 100        | 100 | 0.00 | 0.00  | 0.00  | 0.00                              | 0.600                               |
| 38       | 100        | 100 | 0.00 | 0.00  | 0.00  | 0.00                              | 0.600                               |
| 39       | 100        | 100 | 0.00 | 0.00  | 0.00  | 0.00                              | 0.600                               |
| 40       | 100        | 100 | 0.00 | 0.00  | 0.00  | 0.00                              | 0.600                               |
| 41       | 100        | 100 | 0.00 | 0.00  | 0.00  | 0.00                              | 0.600                               |
| 42       | 100        | 100 | 0.00 | 0.00  | 0.00  | 0.00                              | 0.600                               |
| 43       | 100        | 100 | 0.00 | 0.00  | 0.00  | 0.00                              | 0.600                               |
| 44       | 100        | 100 | 0.00 | 0.00  | 0.00  | 0.00                              | 0.600                               |
| 45       | 100        | 100 | 0.00 | 0.00  | 0.00  | 0.00                              | 0.600                               |
| 46       | 100        | 100 | 0.00 | 0.00  | 0.00  | 0.00                              | 0.600                               |
| 47       | 100        | 100 | 0.00 | 0.00  | 0.00  | 0.00                              | 0.600                               |
| 48       | 100        | 100 | 0.00 | 0.00  | 0.00  | 0.00                              | 0.600                               |
| 49       | 100        | 100 | 0.00 | 0.00  | 0.00  | 0.00                              | 0.600                               |
| 50       | 100        | 100 | 0.00 | 0.00  | 0.00  | 0.00                              | 0.600                               |
| 51       | 100        | 100 | 0.00 | 0.00  | 0.00  | 0.00                              | 0.600                               |
| 52       | 100        | 100 | 0.00 | 0.00  | 0.00  | 0.00                              | 0.600                               |
| 53       | 100        | 100 | 0.00 | 0.00  | 0.00  | 0.00                              | 0.600                               |
| 54       | 100        | 100 | 0.00 | 0.00  | 0.00  | 0.00                              | 0.600                               |
| 55       | 100        | 100 | 0.00 | 0.00  | 0.00  | 0.00                              | 0.600                               |
| 56       | 100        | 100 | 0.00 | 0.00  | 0.00  | 0.00                              | 0.600                               |
| 57       | 100        | 100 | 0.00 | 0.00  | 0.00  | 0.00                              | 0.600                               |
| 58       | 100        | 100 | 0.00 | 0.00  | 0.00  | 0.00                              | 0.600                               |
| 59       | 100        | 100 | 0.00 | 0.00  | 0.00  | 0.00                              | 0.600                               |
| 60       | 100        | 100 | 0.00 | 0.00  | 0.00  | 0.00                              | 0.600                               |
| 61       | 100        | 100 | 0.00 | 0.00  | 0.00  | 0.00                              | 0.600                               |
| 62       | 100        | 100 | 0.00 | 0.00  | 0.00  | 0.00                              | 0.600                               |
| 63       | 100        | 100 | 0.00 | 0.00  | 0.00  | 0.00                              | 0.600                               |
| 64       | 100        | 100 | 0.00 | 0.00  | 0.00  | 0.00                              | 0.600                               |
| 65       | 100        | 100 | 0.00 | 0.00  | 0.00  | 0.00                              | 0.600                               |
| 66       | 100        | 100 | 0.00 | 0.00  | 0.00  | 0.00                              | 0.600                               |
| 67       | 100        | 100 | 0.00 | 0.00  | 0.00  | 0.00                              | 0.600                               |
| 68       | 100        | 100 | 0.00 | 0.00  | 0.00  | 0.00                              | 0.600                               |
| 69       | 100        | 100 | 0.00 | 0.00  | 0.00  | 0.00                              | 0.600                               |
| 70       | 100        | 100 | 0.00 | 0.00  | 0.00  | 0.00                              | 0.600                               |
| 71       | 100        | 100 | 0.00 | 0.00  | 0.00  | 0.00                              | 0.600                               |
| 72       | 100        | 100 | 0.00 | 0.00  | 0.00  | 0.00                              | 0.600                               |
| 73       | 100        | 100 | 0.00 | 0.00  | 0.00  | 0.00                              | 0.600                               |
| 74       | 100        | 100 | 0.00 | 0.00  | 0.00  | 0.00                              | 0.600                               |
| 75       | 100        | 100 | 0.00 | 0.00  | 0.00  | 0.00                              | 0.600                               |
| 76       | 100        | 100 | 0.00 | 0.00  | 0.00  | 0.00                              | 0.600                               |
| 77       | 100        | 100 | 0.00 | 0.00  | 0.00  | 0.00                              | 0.600                               |
| 78       | 100        | 100 | 0.00 | 0.00  | 0.00  | 0.00                              | 0.600                               |
| 79       | 100        | 100 | 0.00 | 0.00  | 0.00  | 0.00                              | 0.600                               |
| 80       | 100        | 100 | 0.00 | 0.00  | 0.00  | 0.00                              | 0.600                               |
| 81       | 100        | 100 | 0.00 | 0.00  | 0.00  | 0.00                              | 0.600                               |
| 82       | 100        | 100 | 0.00 | 0.00  | 0.00  | 0.00                              | 0.600                               |
| 83       | 100        | 100 | 0.00 | 0.00  | 0.00  | 0.00                              | 0.600                               |
| 84       | 100        | 100 | 0.00 | 0.00  | 0.00  | 0.00                              | 0.600                               |
| 85       | 100        | 100 | 0.00 | 0.00  | 0.00  | 0.00                              | 0.600                               |
| 86       | 100        | 100 | 0.00 | 0.00  | 0.00  | 0.00                              | 0.600                               |
| 87       | 100        | 100 | 0.00 | 0.00  | 0.00  | 0.00                              | 0.600                               |
| 88       | 100        | 100 | 0.00 | 0.00  | 0.00  | 0.00                              | 0.600                               |
| 89       | 100        | 100 | 0.00 | 0.00  | 0.00  | 0.00                              | 0.600                               |
| 90       | 100        | 100 | 0.00 | 0.00  | 0.00  | 0.00                              | 0.600                               |
| 91       | 100        | 100 | 0.00 | 0.00  | 0.00  | 0.00                              | 0.600                               |
| 92       | 100        | 100 | 0.00 | 0.00  | 0.00  | 0.00                              | 0.600                               |
| 93       | 100        | 100 | 0.00 | 0.00  | 0.00  | 0.00                              | 0.600                               |
| 94       | 100        | 100 | 0.00 | 0.00  | 0.00  | 0.00                              | 0.600                               |
| 95       | 100        | 100 | 0.00 | 0.00  | 0.00  | 0.00                              | 0.600                               |
| 96       | 100        | 100 | 0.00 | 0.00  | 0.00  | 0.00                              | 0.600                               |
| 97       | 100        | 100 | 0.00 | 0.00  | 0.00  | 0.00                              | 0.600                               |
| 98       | 100        | 100 | 0.00 | 0.00  | 0.00  | 0.00                              | 0.600                               |
| 99       | 100        | 100 | 0.00 | 0.00  | 0.00  | 0.00                              | 0.600                               |
| 100      | 100        | 100 | 0.00 | 0.00  | 0.00  | 0.00                              | 0.600                               |

## NOTES

GC at all compounds substituted: both low and high pH (formic acid and ammonium hydroxide)











Method Number: \_\_\_\_\_

|                                             |      |
|---------------------------------------------|------|
| Technique:                                  | UPLC |
| Instrument energy (kV):                     | 0.9  |
| Number of analyses of interest:             | 1    |
| Number of injections/run for each analysis: | 15   |

|                         |         |                      |       |
|-------------------------|---------|----------------------|-------|
| Instrument Energy Score | 600.32  | % of greenness score | 14.3% |
| Solvent Energy Score    | 2114.69 |                      | 55.3% |
| Solvent EHS Score       | 12.2231 |                      | 30.4% |

**Greenness Score 4187.92**

|                                  |  |
|----------------------------------|--|
| Stock standard prep volume (ml): |  |
| Number of Stock standard preps:  |  |

| Stock standard diluent             | Volume per prep | Density | EHS   | EHS Score per prep | EHS Score all preps | CEO/10 | Solvent Energy Score per prep | Solvent Energy Score all preps |
|------------------------------------|-----------------|---------|-------|--------------------|---------------------|--------|-------------------------------|--------------------------------|
| Solvent 1                          | 0.000           | 0.000   | 0.200 | 0.000              | 0.000               | 0.000  | 0.000                         | 0.000                          |
| Solvent 2                          | 0.000           | 0.000   | 0.000 | 0.000              | 0.000               | 0.000  | 0.000                         | 0.000                          |
| Solvent 3                          | 0.000           | 0.000   | 0.000 | 0.000              | 0.000               | 0.000  | 0.000                         | 0.000                          |
| Working Standard prep volume (ml): | 25              |         |       |                    |                     |        |                               |                                |
| Number of Working standard preps:  | 2               |         |       |                    |                     |        |                               |                                |

| Standard diluent | Volume per prep | Density | EHS   | EHS Score per prep | EHS Score all preps | CEO/10 | Solvent Energy Score per prep | Solvent Energy Score all preps |
|------------------|-----------------|---------|-------|--------------------|---------------------|--------|-------------------------------|--------------------------------|
| Solvent 1        | 15 mL           | 1.000   | 0.319 | 4.786              | 9.573               | 35.223 | 5.880                         | 48.217                         |
| Solvent 2        | 10 mL           | 0.786   | 2.241 | 17.611             | 17.611              | 0.000  | 0.000                         | 92.434                         |
| Solvent 3        | 0.000           | 0.000   | 0.000 | 0.000              | 0.000               | 0.000  | 0.000                         | 0.000                          |

|                          |     |
|--------------------------|-----|
| Sample prep volume (ml): | 500 |
| Number of sample preps:  | 2   |

SAMPLE

| Sample diluent | Volume per prep | Density | EHS   | EHS Score per prep | EHS Score all preps | CEO/10 | Solvent Energy Score per prep | Solvent Energy Score all preps |
|----------------|-----------------|---------|-------|--------------------|---------------------|--------|-------------------------------|--------------------------------|
| Solvent 1      | 300 mL          | 1.000   | 0.319 | 95.728             | 191.455             | 0.001  | 0.300                         | 0.600                          |
| Solvent 2      | 200 mL          | 0.786   | 2.241 | 352.227            | 704.454             | 5.880  | 924.385                       | 1848.572                       |
| Solvent 3      | 0.000           | 0.000   | 0.000 | 0.000              | 0.000               | 0.000  | 0.000                         | 0.000                          |

|                       |    |
|-----------------------|----|
| SST prep volume (ml): | 25 |
| Number of SST preps:  | 1  |

SST

| SST diluent | Volume per prep | Density | EHS   | EHS Score per prep | EHS Score all preps | CEO/10 | Solvent Energy Score per prep | Solvent Energy Score all preps |
|-------------|-----------------|---------|-------|--------------------|---------------------|--------|-------------------------------|--------------------------------|
| Solvent 1   | 15 mL           | 1.000   | 0.319 | 4.786              | 4.786               | 0.001  | 0.015                         | 0.015                          |
| Solvent 2   | 10 mL           | 0.786   | 2.241 | 17.611             | 17.611              | 0.000  | 46.217                        | 46.217                         |
| Solvent 3   | 0.000           | 0.000   | 0.000 | 0.000              | 0.000               | 0.000  | 0.000                         | 0.000                          |

|                                    |     |
|------------------------------------|-----|
| Sensitivity Soln prep volume (ml): | 200 |
| Number of Sensitivity Soln preps:  | 2   |

SENSITIVITY

| Seen by 2.0m diluent | Volume per prep | Density | EHS   | EHS Score per prep | EHS Score all preps | CEO/10 | Solvent Energy Score per prep | Solvent Energy Score all preps |
|----------------------|-----------------|---------|-------|--------------------|---------------------|--------|-------------------------------|--------------------------------|
| Solvent 1            | 200 mL          | 1.000   | 0.319 | 63.818             | 127.637             | 0.001  | 0.200                         | 0.400                          |
| Solvent 2            | 0.000           | 0.000   | 0.000 | 0.000              | 0.000               | 0.000  | 0.000                         | 0.000                          |
| Solvent 3            | 0.000           | 0.000   | 0.000 | 0.000              | 0.000               | 0.000  | 0.000                         | 0.000                          |

MOBILE PHASES

| Mobile phase A | Volume per injection | Density | EHS   | EHS Score per prep | EHS Score all preps | CEO/10 | Solvent Energy Score per injection | Solvent Energy Score all injections |
|----------------|----------------------|---------|-------|--------------------|---------------------|--------|------------------------------------|-------------------------------------|
| Solvent 1      | 11.57 mL             | 1.000   | 0.319 | 3.693              | 55.392              | 0.001  | 0.012                              | 0.174                               |
| Solvent 2      | 0.000                | 0.000   | 0.000 | 0.000              | 0.000               | 0.000  | 0.000                              | 0.000                               |
| Solvent 3      | 0.000                | 0.000   | 0.000 | 0.000              | 0.000               | 0.000  | 0.000                              | 0.000                               |

MOBILE PHASE B

| Mobile phase B | Volume per injection | Density | EHS   | EHS Score per prep | EHS Score all preps | CEO/10 | Solvent Energy Score per injection | Solvent Energy Score all injections |
|----------------|----------------------|---------|-------|--------------------|---------------------|--------|------------------------------------|-------------------------------------|
| Solvent 1      | 4.70 mL              | 0.786   | 2.241 | 8.285              | 134.728             | 5.880  | 21.743                             | 326.139                             |
| Solvent 2      | 0.52 mL              | 1.000   | 0.319 | 0.167              | 2.502               | 0.001  | 0.001                              | 0.008                               |
| Solvent 3      | 0.00 mL              | 0.000   | 0.000 | 0.000              | 0.000               | 0.000  | 0.000                              | 0.000                               |

|                           |     |
|---------------------------|-----|
| Flow rate (ml/min):       | 0.6 |
| Run time (min/injection): | 28  |

INSTRUMENT CONDITIONS

| Gradient | %A | %B  | A     | B    | MIP volume per gradient step (ml) |
|----------|----|-----|-------|------|-----------------------------------|
| 0        | 94 | 6   | 0.56  | 0.04 |                                   |
| 1        | 83 | 17  | 1.00  | 0.14 |                                   |
| 8        | 83 | 17  | 1.99  | 0.43 |                                   |
| 20       | 66 | 34  | 5.36  | 1.84 |                                   |
| 22       | 0  | 100 | 0.40  | 0.80 |                                   |
| 25       | 0  | 100 | 0.00  | 1.80 |                                   |
| 26       | 0  | 100 | 0.00  | 0.10 |                                   |
| 28       | 94 | 6   | 1.64  | 0.10 |                                   |
|          |    | 100 | 0.00  | 0.00 |                                   |
|          |    |     | 11.57 | 5.23 |                                   |

NOTES

|  |
|--|
|  |
|--|

Method Number:

Greenness Score 64112.27

|                                             |      |
|---------------------------------------------|------|
| Technique:                                  | HPLC |
| Instrument energy (MJ):                     | 1.0  |
| Number of analyses of interest:             | 1    |
| Number of injections/run for each analysis: | 15   |

|                         |          |                      |        |
|-------------------------|----------|----------------------|--------|
| Instrument Energy Score | 100.0/64 | % of greenness score | 15.7%  |
| Solvent Energy Score    | 3478.78  |                      | 54.3%  |
| Solvent EHS Score       | 1928.85  |                      | 30.17% |

Stock standard prep volume (ml):

|                                  |  |                                |  |                                 |  |
|----------------------------------|--|--------------------------------|--|---------------------------------|--|
| Stock standard prep volume (ml): |  | Solvent Energy Score per prep: |  | Solvent Energy Score all preps: |  |
|----------------------------------|--|--------------------------------|--|---------------------------------|--|

| Stock standard diluent | Volume per prep | Density | EHS   | EHS Score per prep | EHS Score all preps | CEO/JO | Solvent Energy Score per prep | Solvent Energy Score all preps |
|------------------------|-----------------|---------|-------|--------------------|---------------------|--------|-------------------------------|--------------------------------|
| Solvent 1              | 0.000           | 0.000   | 0.000 | 0.000              | 0.000               | 0.000  | 0.000                         | 0.000                          |
| Solvent 2              | 0.000           | 0.000   | 0.000 | 0.000              | 0.000               | 0.000  | 0.000                         | 0.000                          |
| Solvent 3              | 0.000           | 0.000   | 0.000 | 0.000              | 0.000               | 0.000  | 0.000                         | 0.000                          |

Working Standard prep volume (ml):

|                                    |  |                                |  |                                 |  |
|------------------------------------|--|--------------------------------|--|---------------------------------|--|
| Working Standard prep volume (ml): |  | Solvent Energy Score per prep: |  | Solvent Energy Score all preps: |  |
|------------------------------------|--|--------------------------------|--|---------------------------------|--|

| Standard diluent | Volume per prep | Density | EHS   | EHS Score per prep | EHS Score all preps | CEO/JO | Solvent Energy Score per prep | Solvent Energy Score all preps |
|------------------|-----------------|---------|-------|--------------------|---------------------|--------|-------------------------------|--------------------------------|
| Solvent 1        | 15 mL           | 1.000   | 0.319 | 4.786              | 191.455             | 0.001  | 0.015                         | 0.600                          |
| Solvent 2        | 10 mL           | 0.786   | 2.241 | 35.2727            | 794.654             | 5.880  | 46.217                        | 92.434                         |
| Solvent 3        | 0 mL            | 0.000   | 0.000 | 0.000              | 0.000               | 0.000  | 0.000                         | 0.000                          |

Sample prep volume (ml):

|                          |  |                                |  |                                 |  |
|--------------------------|--|--------------------------------|--|---------------------------------|--|
| Sample prep volume (ml): |  | Solvent Energy Score per prep: |  | Solvent Energy Score all preps: |  |
|--------------------------|--|--------------------------------|--|---------------------------------|--|

| Sample diluent | Volume per prep | Density | EHS   | EHS Score per prep | EHS Score all preps | CEO/JO | Solvent Energy Score per prep | Solvent Energy Score all preps |
|----------------|-----------------|---------|-------|--------------------|---------------------|--------|-------------------------------|--------------------------------|
| Solvent 1      | 300 mL          | 1.000   | 0.319 | 95.728             | 191.455             | 0.001  | 0.300                         | 0.600                          |
| Solvent 2      | 200 mL          | 0.786   | 2.241 | 35.2727            | 794.654             | 5.880  | 92.385                        | 186.872                        |
| Solvent 3      | 0 mL            | 0.000   | 0.000 | 0.000              | 0.000               | 0.000  | 0.000                         | 0.000                          |

SST prep volume (ml):

|                       |  |                                |  |                                 |  |
|-----------------------|--|--------------------------------|--|---------------------------------|--|
| SST prep volume (ml): |  | Solvent Energy Score per prep: |  | Solvent Energy Score all preps: |  |
|-----------------------|--|--------------------------------|--|---------------------------------|--|

| SST diluent | Volume per prep | Density | EHS   | EHS Score per prep | EHS Score all preps | CEO/JO | Solvent Energy Score per prep | Solvent Energy Score all preps |
|-------------|-----------------|---------|-------|--------------------|---------------------|--------|-------------------------------|--------------------------------|
| Solvent 1   | 15 mL           | 1.000   | 0.319 | 4.786              | 191.455             | 0.001  | 0.015                         | 0.015                          |
| Solvent 2   | 10 mL           | 0.786   | 2.241 | 17.611             | 17.611              | 5.880  | 46.217                        | 46.217                         |
| Solvent 3   | 0 mL            | 0.000   | 0.000 | 0.000              | 0.000               | 0.000  | 0.000                         | 0.000                          |

Sensitivity Soln prep volume (ml):

|                                    |  |                                |  |                                 |  |
|------------------------------------|--|--------------------------------|--|---------------------------------|--|
| Sensitivity Soln prep volume (ml): |  | Solvent Energy Score per prep: |  | Solvent Energy Score all preps: |  |
|------------------------------------|--|--------------------------------|--|---------------------------------|--|

| Sensitivity Soln prep volume (ml): | Volume per prep | Density | EHS   | EHS Score per prep | EHS Score all preps | CEO/JO | Solvent Energy Score per prep | Solvent Energy Score all preps |
|------------------------------------|-----------------|---------|-------|--------------------|---------------------|--------|-------------------------------|--------------------------------|
| Solvent 1                          | 200 mL          | 1.000   | 0.319 | 63.818             | 127.637             | 0.001  | 0.200                         | 0.400                          |
| Solvent 2                          | 0 mL            | 0.000   | 0.000 | 0.000              | 0.000               | 0.000  | 0.000                         | 0.000                          |
| Solvent 3                          | 0 mL            | 0.000   | 0.000 | 0.000              | 0.000               | 0.000  | 0.000                         | 0.000                          |

Mobile phase A

| Mobile phase A | Volume per injection | Density | EHS   | EHS Score per prep | EHS Score all preps | CEO/JO | Solvent Energy Score per injection | Solvent Energy Score all injections |
|----------------|----------------------|---------|-------|--------------------|---------------------|--------|------------------------------------|-------------------------------------|
| Solvent 1      | 54.13 mL             | 1.000   | 0.319 | 17.271             | 259.068             | 0.001  | 0.054                              | 0.812                               |
| Solvent 2      | 0.00 mL              | 0.000   | 0.000 | 0.000              | 0.000               | 0.000  | 0.000                              | 0.000                               |
| Solvent 3      | 0.00 mL              | 0.000   | 0.000 | 0.000              | 0.000               | 0.000  | 0.000                              | 0.000                               |

Mobile phase B

| Mobile phase B | Volume per injection | Density | EHS   | EHS Score per prep | EHS Score all preps | CEO/JO | Solvent Energy Score per injection | Solvent Energy Score all injections |
|----------------|----------------------|---------|-------|--------------------|---------------------|--------|------------------------------------|-------------------------------------|
| Solvent 1      | 21.49 mL             | 0.786   | 2.241 | 37.814             | 567.612             | 0.001  | 0.020                              | 1.489.583                           |
| Solvent 2      | 2.59 mL              | 1.000   | 0.319 | 0.782              | 11.427              | 0.001  | 0.002                              | 0.035                               |
| Solvent 3      | 0.00 mL              | 0.000   | 0.000 | 0.000              | 0.000               | 0.000  | 0.000                              | 0.000                               |

Flow rate (ml/min):

|                     |  |                          |  |
|---------------------|--|--------------------------|--|
| Flow rate (ml/min): |  | Run Time (min/injection) |  |
|---------------------|--|--------------------------|--|

| Gradient | Time (min) | %A | %B  | A     | B     |
|----------|------------|----|-----|-------|-------|
|          | 0          | 94 | 6   | 2.82  | 0.18  |
|          | 1.5        | 94 | 6   | 7.13  | 1.44  |
|          | 11.5       | 88 | 12  | 9.13  | 1.87  |
|          | 29         | 66 | 34  | 26.08 | 8.93  |
|          | 31.5       | 0  | 100 | 1.65  | 3.35  |
|          | 35.5       | 0  | 100 | 0.00  | 6.00  |
|          | 39         | 0  | 100 | 6.38  | 0.41  |
|          | 39         | 94 | 6   | 0.00  | 0.00  |
|          |            |    | 100 | 0.00  | 0.00  |
|          |            |    |     | 54.13 | 23.87 |

INSTRUMENT CONDITIONS

MOBILE PHASES

SENSITIVITY

SST

SAMPLE

STANDARDS

METHOD

NOTES

|  |
|--|
|  |
|--|





Method Number: 26-3FC-published method

|                                             |     |
|---------------------------------------------|-----|
| Technique:                                  | SFC |
| Instrument energy (kV):                     | 1.2 |
| Number of analyses of interest:             | 2   |
| Number of injections/run for each analysis: | 15  |

|                         |        |                      |       |
|-------------------------|--------|----------------------|-------|
| Instrument Energy Score | 74.80  | % of greenness score | 22.3% |
| Solvent Energy Score    | 227.11 |                      | 67.7% |
| Solvent EHS Score       | 3.244  |                      | 10.0% |

**Greenness Score 335.35**

|                                  |    |
|----------------------------------|----|
| Stock standard prep volume (mL): | 50 |
| Number of Stock standard preps:  | 1  |

| Stock standard diluent | Volume per prep | Density | EHS   | EHS Score per prep | EHS Score all preps | CE0/10 | Solvent Energy Score per prep | Solvent Energy Score all preps |
|------------------------|-----------------|---------|-------|--------------------|---------------------|--------|-------------------------------|--------------------------------|
| Solvent 1              | 50 mL           | 0.792   | 0.272 | 10.785             | 10.785              | 1.850  | 73.160                        | 73.160                         |
| Solvent 2              | 0 mL            | 0.000   | 0.000 | 0.000              | 0.000               | 0.000  | 0.000                         | 0.000                          |
| Solvent 3              | 0 mL            | 0.000   | 0.000 | 0.000              | 0.000               | 0.000  | 0.000                         | 0.000                          |

|                                    |    |
|------------------------------------|----|
| Working Standard prep volume (mL): | 50 |
| Number of Working standard preps:  | 2  |

| Standard diluent | Volume per prep | Density | EHS   | EHS Score per prep | EHS Score all preps | CE0/10 | Solvent Energy Score per prep | Solvent Energy Score all preps |
|------------------|-----------------|---------|-------|--------------------|---------------------|--------|-------------------------------|--------------------------------|
| Solvent 1        | 50 mL           | 0.792   | 0.272 | 10.785             | 21.570              | 1.850  | 73.160                        | 146.320                        |
| Solvent 2        | 0 mL            | 0.000   | 0.000 | 0.000              | 0.000               | 0.000  | 0.000                         | 0.000                          |
| Solvent 3        | 0 mL            | 0.000   | 0.000 | 0.000              | 0.000               | 0.000  | 0.000                         | 0.000                          |

|                          |    |
|--------------------------|----|
| Sample prep volume (mL): | 50 |
| Number of sample preps:  | 1  |

| Sample diluent | Volume per prep | Density | EHS   | EHS Score per prep | EHS Score all preps | CE0/10 | Solvent Energy Score per prep | Solvent Energy Score all preps |
|----------------|-----------------|---------|-------|--------------------|---------------------|--------|-------------------------------|--------------------------------|
| Solvent 1      | 50 mL           | 0.792   | 0.272 | 10.785             | 10.785              | 1.850  | 73.160                        | 73.160                         |
| Solvent 2      | 0 mL            | 0.000   | 0.000 | 0.000              | 0.000               | 0.000  | 0.000                         | 0.000                          |
| Solvent 3      | 0 mL            | 0.000   | 0.000 | 0.000              | 0.000               | 0.000  | 0.000                         | 0.000                          |

|                       |    |
|-----------------------|----|
| SST prep volume (mL): | 50 |
| Number of SST preps:  | 1  |

| SST diluent | Volume per prep | Density | EHS   | EHS Score per prep | EHS Score all preps | CE0/10 | Solvent Energy Score per prep | Solvent Energy Score all preps |
|-------------|-----------------|---------|-------|--------------------|---------------------|--------|-------------------------------|--------------------------------|
| Solvent 1   | 50 mL           | 0.792   | 0.272 | 10.785             | 10.785              | 1.850  | 73.160                        | 73.160                         |
| Solvent 2   | 0 mL            | 0.000   | 0.000 | 0.000              | 0.000               | 0.000  | 0.000                         | 0.000                          |
| Solvent 3   | 0 mL            | 0.000   | 0.000 | 0.000              | 0.000               | 0.000  | 0.000                         | 0.000                          |

|                                    |  |
|------------------------------------|--|
| Sensitivity Soln prep volume (mL): |  |
| Number of Sensitivity Soln preps:  |  |

| Sensitivity Soln prep | Volume per prep | Density | EHS   | EHS Score per prep | EHS Score all preps | CE0/10 | Solvent Energy Score per prep | Solvent Energy Score all preps |
|-----------------------|-----------------|---------|-------|--------------------|---------------------|--------|-------------------------------|--------------------------------|
| Solvent 1             | 0 mL            | 0.792   | 0.272 | 0.000              | 0.000               | 1.850  | 0.000                         | 0.000                          |
| Solvent 2             | 0 mL            | 0.000   | 0.000 | 0.000              | 0.000               | 0.000  | 0.000                         | 0.000                          |
| Solvent 3             | 0 mL            | 0.000   | 0.000 | 0.000              | 0.000               | 0.000  | 0.000                         | 0.000                          |

MOBILE PHASE A

| Solvent   | Percent | Volume per injection | Density | EHS   | EHS Score per prep | EHS Score all preps | CE0/10 | Solvent Energy Score per injection | Solvent Energy Score all injections |
|-----------|---------|----------------------|---------|-------|--------------------|---------------------|--------|------------------------------------|-------------------------------------|
| Solvent 1 | 100     | 16.00 mL             | 0.002   | 0.218 | 0.001              | 0.018               | 0.001  | 0.000                              | 0.000                               |
| Solvent 2 |         | 0.00 mL              | 0.000   | 0.000 | 0.000              | 0.000               | 0.000  | 0.000                              | 0.000                               |
| Solvent 3 |         | 0.00 mL              | 0.000   | 0.000 | 0.000              | 0.000               | 0.000  | 0.000                              | 0.000                               |

MOBILE PHASE B

| Solvent   | Percent | Volume per injection | Density | EHS   | EHS Score per prep | EHS Score all preps | CE0/10 | Solvent Energy Score per injection | Solvent Energy Score all injections |
|-----------|---------|----------------------|---------|-------|--------------------|---------------------|--------|------------------------------------|-------------------------------------|
| Solvent 1 | 100     | 4.00 mL              | 0.792   | 0.272 | 0.813              | 12.592              | 1.850  | 5.881                              | 87.912                              |
| Solvent 2 |         | 0.00 mL              | 0.000   | 0.000 | 0.000              | 0.000               | 0.000  | 0.000                              | 0.000                               |
| Solvent 3 |         | 0.00 mL              | 0.000   | 0.000 | 0.000              | 0.000               | 0.000  | 0.000                              | 0.000                               |

|                           |   |
|---------------------------|---|
| Flow rate (mL/min):       | 4 |
| Run time (min/injection): | 5 |

| Gradient | Time (min) | %A | %B | A     | B    |
|----------|------------|----|----|-------|------|
|          | 0          | 80 | 20 | 16.00 | 4.00 |
|          | 5          | 80 | 20 | 16.00 | 4.00 |
|          | 10         | 80 | 20 | 16.00 | 4.00 |
|          | 15         | 80 | 20 | 16.00 | 4.00 |
|          | 20         | 80 | 20 | 16.00 | 4.00 |
|          | 25         | 80 | 20 | 16.00 | 4.00 |
|          | 30         | 80 | 20 | 16.00 | 4.00 |
|          | 35         | 80 | 20 | 16.00 | 4.00 |
|          | 40         | 80 | 20 | 16.00 | 4.00 |
|          | 45         | 80 | 20 | 16.00 | 4.00 |
|          | 50         | 80 | 20 | 16.00 | 4.00 |
|          | 55         | 80 | 20 | 16.00 | 4.00 |
|          | 60         | 80 | 20 | 16.00 | 4.00 |
|          | 65         | 80 | 20 | 16.00 | 4.00 |
|          | 70         | 80 | 20 | 16.00 | 4.00 |
|          | 75         | 80 | 20 | 16.00 | 4.00 |
|          | 80         | 80 | 20 | 16.00 | 4.00 |
|          | 85         | 80 | 20 | 16.00 | 4.00 |
|          | 90         | 80 | 20 | 16.00 | 4.00 |
|          | 95         | 80 | 20 | 16.00 | 4.00 |
|          | 100        | 80 | 20 | 16.00 | 4.00 |
|          | 105        | 80 | 20 | 16.00 | 4.00 |
|          | 110        | 80 | 20 | 16.00 | 4.00 |
|          | 115        | 80 | 20 | 16.00 | 4.00 |
|          | 120        | 80 | 20 | 16.00 | 4.00 |
|          | 125        | 80 | 20 | 16.00 | 4.00 |
|          | 130        | 80 | 20 | 16.00 | 4.00 |
|          | 135        | 80 | 20 | 16.00 | 4.00 |
|          | 140        | 80 | 20 | 16.00 | 4.00 |
|          | 145        | 80 | 20 | 16.00 | 4.00 |
|          | 150        | 80 | 20 | 16.00 | 4.00 |
|          | 155        | 80 | 20 | 16.00 | 4.00 |
|          | 160        | 80 | 20 | 16.00 | 4.00 |
|          | 165        | 80 | 20 | 16.00 | 4.00 |
|          | 170        | 80 | 20 | 16.00 | 4.00 |
|          | 175        | 80 | 20 | 16.00 | 4.00 |
|          | 180        | 80 | 20 | 16.00 | 4.00 |
|          | 185        | 80 | 20 | 16.00 | 4.00 |
|          | 190        | 80 | 20 | 16.00 | 4.00 |
|          | 195        | 80 | 20 | 16.00 | 4.00 |
|          | 200        | 80 | 20 | 16.00 | 4.00 |
|          | 205        | 80 | 20 | 16.00 | 4.00 |
|          | 210        | 80 | 20 | 16.00 | 4.00 |
|          | 215        | 80 | 20 | 16.00 | 4.00 |
|          | 220        | 80 | 20 | 16.00 | 4.00 |
|          | 225        | 80 | 20 | 16.00 | 4.00 |
|          | 230        | 80 | 20 | 16.00 | 4.00 |
|          | 235        | 80 | 20 | 16.00 | 4.00 |
|          | 240        | 80 | 20 | 16.00 | 4.00 |
|          | 245        | 80 | 20 | 16.00 | 4.00 |
|          | 250        | 80 | 20 | 16.00 | 4.00 |
|          | 255        | 80 | 20 | 16.00 | 4.00 |
|          | 260        | 80 | 20 | 16.00 | 4.00 |
|          | 265        | 80 | 20 | 16.00 | 4.00 |
|          | 270        | 80 | 20 | 16.00 | 4.00 |
|          | 275        | 80 | 20 | 16.00 | 4.00 |
|          | 280        | 80 | 20 | 16.00 | 4.00 |
|          | 285        | 80 | 20 | 16.00 | 4.00 |
|          | 290        | 80 | 20 | 16.00 | 4.00 |
|          | 295        | 80 | 20 | 16.00 | 4.00 |
|          | 300        | 80 | 20 | 16.00 | 4.00 |
|          | 305        | 80 | 20 | 16.00 | 4.00 |
|          | 310        | 80 | 20 | 16.00 | 4.00 |
|          | 315        | 80 | 20 | 16.00 | 4.00 |
|          | 320        | 80 | 20 | 16.00 | 4.00 |
|          | 325        | 80 | 20 | 16.00 | 4.00 |
|          | 330        | 80 | 20 | 16.00 | 4.00 |
|          | 335        | 80 | 20 | 16.00 | 4.00 |
|          | 340        | 80 | 20 | 16.00 | 4.00 |
|          | 345        | 80 | 20 | 16.00 | 4.00 |
|          | 350        | 80 | 20 | 16.00 | 4.00 |
|          | 355        | 80 | 20 | 16.00 | 4.00 |
|          | 360        | 80 | 20 | 16.00 | 4.00 |
|          | 365        | 80 | 20 | 16.00 | 4.00 |
|          | 370        | 80 | 20 | 16.00 | 4.00 |
|          | 375        | 80 | 20 | 16.00 | 4.00 |
|          | 380        | 80 | 20 | 16.00 | 4.00 |
|          | 385        | 80 | 20 | 16.00 | 4.00 |
|          | 390        | 80 | 20 | 16.00 | 4.00 |
|          | 395        | 80 | 20 | 16.00 | 4.00 |
|          | 400        | 80 | 20 | 16.00 | 4.00 |
|          | 405        | 80 | 20 | 16.00 | 4.00 |
|          | 410        | 80 | 20 | 16.00 | 4.00 |
|          | 415        | 80 | 20 | 16.00 | 4.00 |
|          | 420        | 80 | 20 | 16.00 | 4.00 |
|          | 425        | 80 | 20 | 16.00 | 4.00 |
|          | 430        | 80 | 20 | 16.00 | 4.00 |
|          | 435        | 80 | 20 | 16.00 | 4.00 |
|          | 440        | 80 | 20 | 16.00 | 4.00 |
|          | 445        | 80 | 20 | 16.00 | 4.00 |
|          | 450        | 80 | 20 | 16.00 | 4.00 |
|          | 455        | 80 | 20 | 16.00 | 4.00 |
|          | 460        | 80 | 20 | 16.00 | 4.00 |
|          | 465        | 80 | 20 | 16.00 | 4.00 |
|          | 470        | 80 | 20 | 16.00 | 4.00 |
|          | 475        | 80 | 20 | 16.00 | 4.00 |
|          | 480        | 80 | 20 | 16.00 | 4.00 |
|          | 485        | 80 | 20 | 16.00 | 4.00 |
|          | 490        | 80 | 20 | 16.00 | 4.00 |
|          | 495        | 80 | 20 | 16.00 | 4.00 |
|          | 500        | 80 | 20 | 16.00 | 4.00 |

NOTES

Method is assay and degradation products method (analysis = 7).  
 Mobile phase additive is 0.05% TFA  
 Az150 is on a low level (inert) standard which isn't captured specifically in the above table. It's prepared in a 1 x 200 mL volumetric flask. To account for this, I have added a (1600 nL) additional SST preparation. Please remove if this causes issues.  
 Phase 3 validated!
